# Supplementary material for: A Novel Oxidative Phosphorylation-Associated Gene Signature for Prognosis Prediction in Patients with Hepatocellular Carcinoma
Source: PubMed Central journal article supplement (PMC9467772; doi:10.1155/2022/3594901), 2022-09-05
Supplement: 3594901.f1.pdf [file 3594901.f1.pdf]

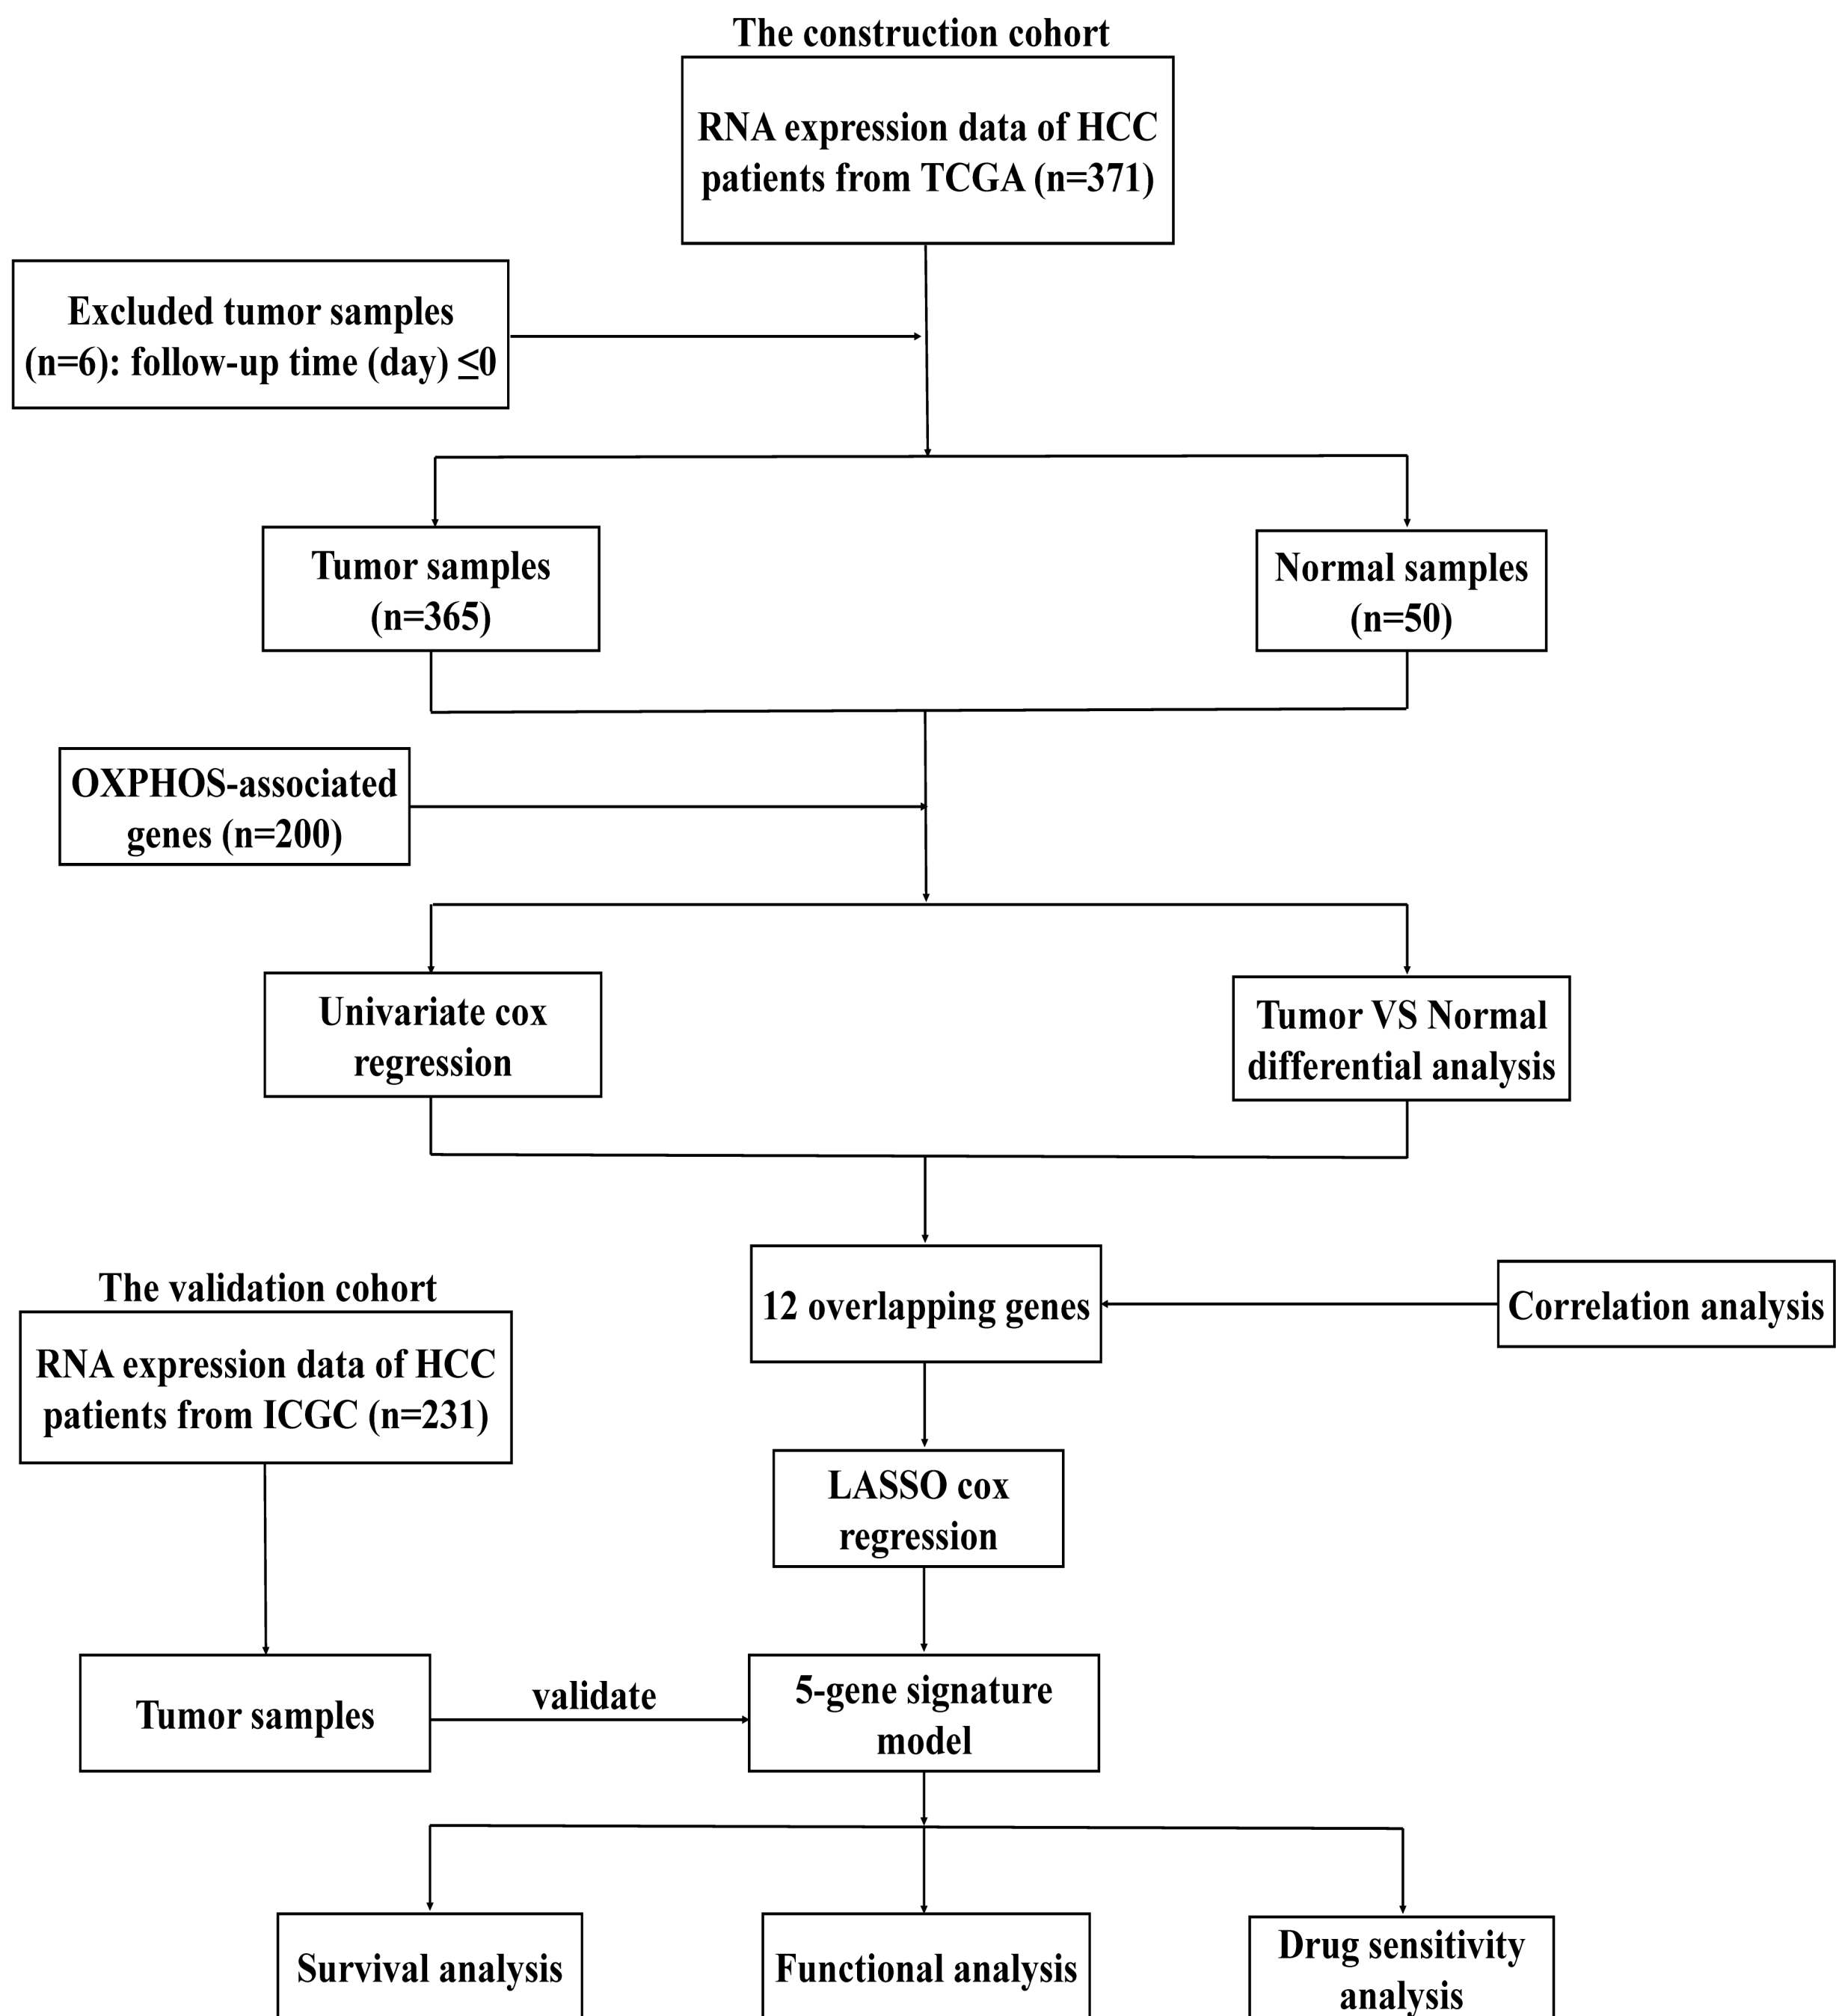

Supplementary Figure S2

A

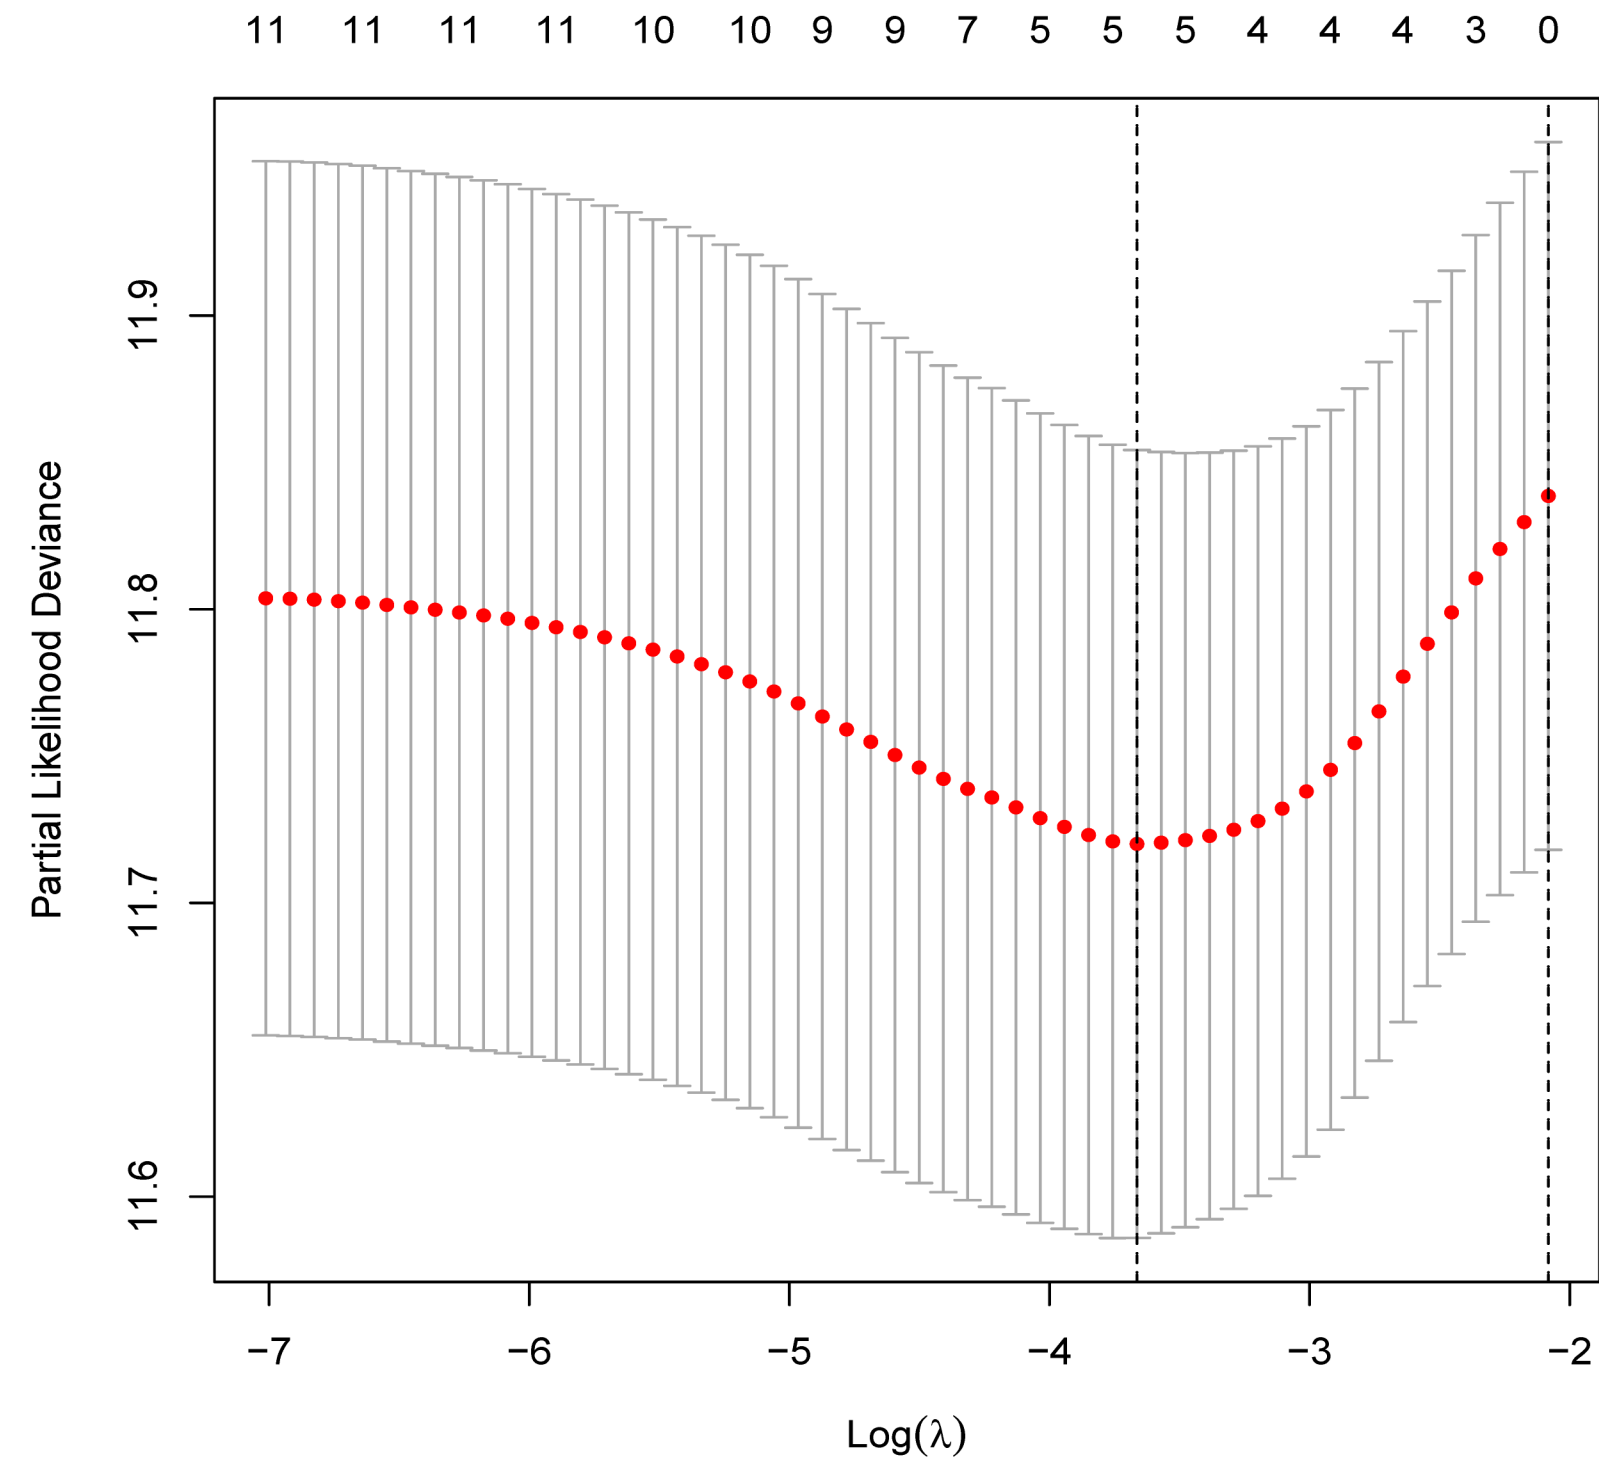

B

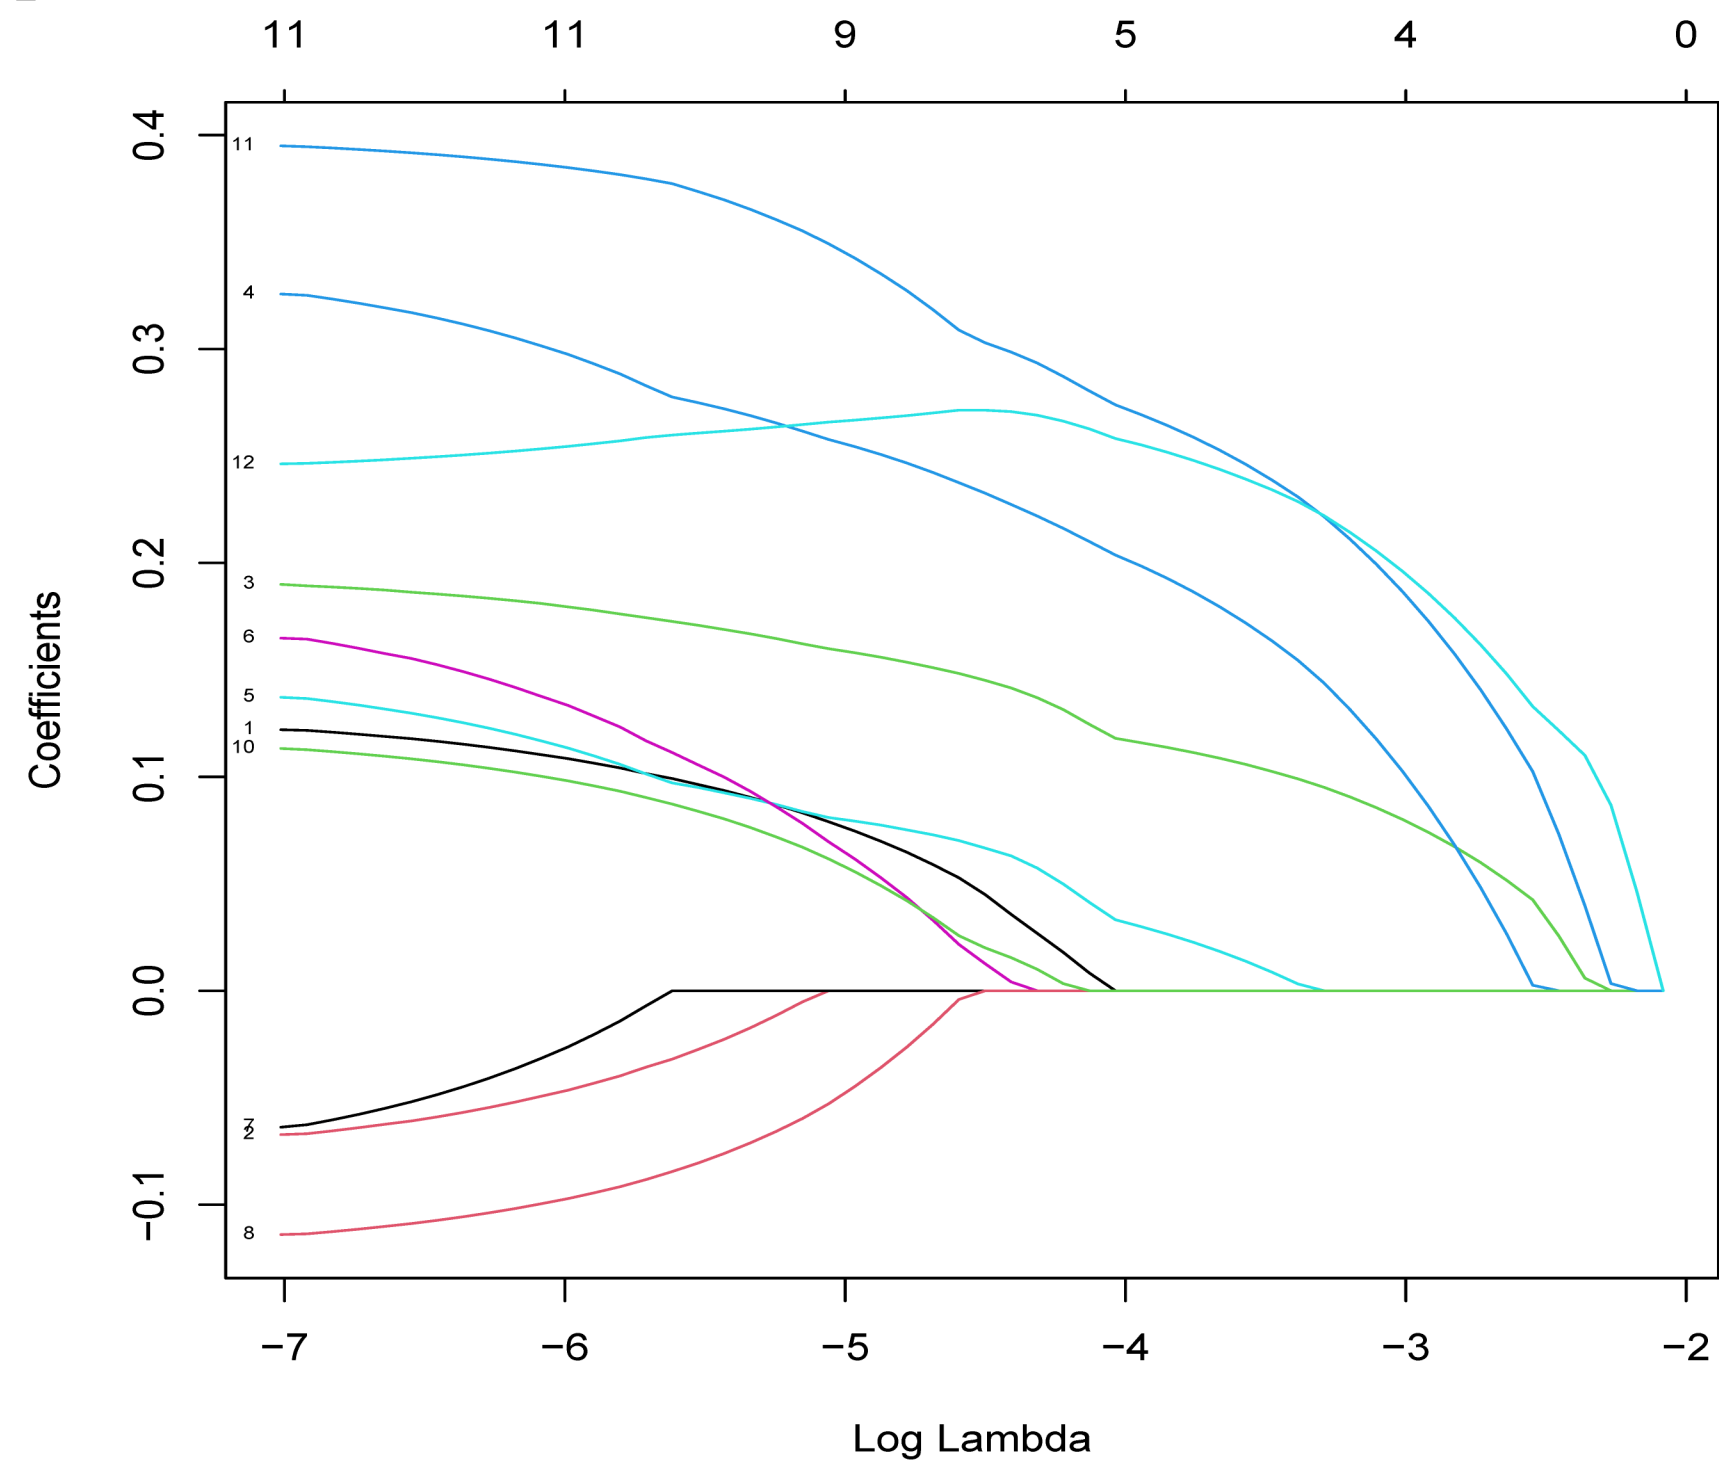

**Supplementary Table S1. OXPHOS-associated genes**

| Gene name |         |          |         |          |          |        |
|-----------|---------|----------|---------|----------|----------|--------|
| ABCB7     | BDH2    | GRPEL1   | NDUFA5  | POR      | ATP6V0B  | MRPS12 |
| ACAA1     | CASP7   | HADHA    | NDUFA6  | PRDX3    | ATP6V0C  | MRPS15 |
| ACAA2     | COX10   | HADHB    | NDUFA7  | RETSAT   | ATP6V0E1 | MRPS22 |
| ACADM     | COX11   | HCCS     | NDUFA8  | RHOT1    | ATP6V1C1 | MRPS30 |
| ACADSB    | COX15   | HSD17B10 | NDUFA9  | RHOT2    | ATP6V1D  | MTRF1  |
| ACADVL    | COX17   | HSPA9    | NDUFAB1 | SDHA     | ATP6V1E1 | MTRR   |
| ACAT1     | COX4I1  | HTRA2    | NDUFB1  | SDHB     | ATP6V1F  | MTX2   |
| ACO2      | COX5A   | IDH1     | NDUFB2  | SDHC     | ATP6V1G1 | NDUFA1 |
| AFG3L2    | COX5B   | IDH2     | NDUFB3  | SDHD     | ATP6V1H  | NDUFA2 |
| AIFM1     | COX6A1  | IDH3A    | NDUFB4  | SLC25A11 | BAX      | NDUFA3 |
| ALAS1     | COX6B1  | IDH3B    | NDUFB5  | SLC25A12 | BCKDHA   | NDUFA4 |
| ALDH6A1   | COX6C   | IDH3G    | NDUFB6  | SLC25A20 | ECI1     | OPA1   |
| ATP1B1    | COX7A2  | IMMT     | NDUFB7  | SLC25A3  | ETFA     | OXA1L  |
| ATP5F1A   | COX7A2L | ISCA1    | NDUFB8  | SLC25A4  | ETFB     | PDHA1  |
| ATP5F1B   | COX7B   | ISCU     | NDUFC1  | SLC25A5  | ETFDH    | PDHB   |
| ATP5F1C   | COX7C   | LDHA     | NDUFC2  | SLC25A6  | FDX1     | PDHX   |
| ATP5F1D   | COX8A   | LDHB     | NDUFS1  | SUCLA2   | FH       | PDK4   |
| ATP5F1E   | CPT1A   | LRPPRC   | NDUFS2  | SUCLG1   | FXN      | PDP1   |
| ATP5MC1   | CS      | MAOB     | NDUFS3  | SUPV3L1  | GLUD1    | PHB2   |
| ATP5MC2   | CYB5A   | MDH1     | NDUFS4  | SURF1    | GOT2     | PHYH   |
| ATP5MC3   | CYB5R3  | MDH2     | NDUFS6  | TCIRG1   | GPI      | PMPCA  |
| ATP5ME    | CYC1    | MFN2     | NDUFS7  | TIMM10   | GPX4     | POLR2F |
| ATP5MF    | CYCS    | MGST3    | NDUFS8  | TIMM13   | UQCR10   | UQCRH  |
| ATP5MG    | DECR1   | MPC1     | NDUFV1  | TIMM17A  | UQCR11   | UQCRQ  |
| ATP5PB    | DLAT    | MRPL11   | NDUFV2  | TIMM50   | UQCRB    | VDAC1  |
| ATP5PD    | DLD     | MRPL15   | NNT     | TIMM8B   | UQCRC1   | VDAC2  |
| ATP5PF    | DLST    | MRPL34   | NQO2    | TIMM9    | UQCRC2   |        |
| ATP5PO    | ECH1    | MRPL35   | OAT     | TOMM22   | UQCRFS1  |        |
| ATP6AP1   | ECHS1   | MRPS11   | OGDH    | TOMM70   | VDAC3    |        |

**Supplementary Table S2. The annotated gene set file applied in ssGSEA**

| Immune types       | Genes                                                                                                                                                                                                                                                                                                                                                                                                                                                                                                                                                                                                                                                                                                                                                                                                                                                                                                                                                                                                                                                                                                                                                                                                                                                                                                                                                                                                                                                                                                                                                                                                                                                                                          |
|--------------------|------------------------------------------------------------------------------------------------------------------------------------------------------------------------------------------------------------------------------------------------------------------------------------------------------------------------------------------------------------------------------------------------------------------------------------------------------------------------------------------------------------------------------------------------------------------------------------------------------------------------------------------------------------------------------------------------------------------------------------------------------------------------------------------------------------------------------------------------------------------------------------------------------------------------------------------------------------------------------------------------------------------------------------------------------------------------------------------------------------------------------------------------------------------------------------------------------------------------------------------------------------------------------------------------------------------------------------------------------------------------------------------------------------------------------------------------------------------------------------------------------------------------------------------------------------------------------------------------------------------------------------------------------------------------------------------------|
| aDCs               | CD83 LAMP3 CCL1                                                                                                                                                                                                                                                                                                                                                                                                                                                                                                                                                                                                                                                                                                                                                                                                                                                                                                                                                                                                                                                                                                                                                                                                                                                                                                                                                                                                                                                                                                                                                                                                                                                                                |
| APC_co_inhibition  | C10orf54 CD274 LGALS9 PDCD1LG2 PVRL3                                                                                                                                                                                                                                                                                                                                                                                                                                                                                                                                                                                                                                                                                                                                                                                                                                                                                                                                                                                                                                                                                                                                                                                                                                                                                                                                                                                                                                                                                                                                                                                                                                                           |
| APC_co_stimulation | CD40 CD58 CD70 ICOSLG SLAMF1 TNFSF14 TNFSF15<br>TNFSF18 TNFSF4 TNFSF8 TNFSF9                                                                                                                                                                                                                                                                                                                                                                                                                                                                                                                                                                                                                                                                                                                                                                                                                                                                                                                                                                                                                                                                                                                                                                                                                                                                                                                                                                                                                                                                                                                                                                                                                   |
| B_cells            | BACH2 BANK1 BLK BTLA CD79A CD79B FCRL1<br>FCRL3 HVCN1 RALGPS2                                                                                                                                                                                                                                                                                                                                                                                                                                                                                                                                                                                                                                                                                                                                                                                                                                                                                                                                                                                                                                                                                                                                                                                                                                                                                                                                                                                                                                                                                                                                                                                                                                  |
| CCR                | CCL16 TPO TGFB2 CXCL2 CCL14 TGFB3 IL11RA<br>CCL11 IL41 IL33 CXCL12 CXCL10 BMPER BMP8A<br>CXCL11 IL21R IL17B TNFRSF9 IL2 CX3CR1 CCR8<br>TNFSF12 CSF3 TNFSF4 BMP3 CX3CL1 BMP5 CXCR2<br>TNFRSF10D BMP2 CXCL14 CCL28 CXCL3 BMP6<br>CCL21 CXCL9 CCL23 IL6 TNFRSF18 IL17RD IL17D<br>IL27 CCL7 IL1R1 CXCR4 CXCR2P1TGFB1I1 IFNGR1 IL9R<br>IL1RAPL1IL11 CSF1 IL20RA IL25 TNFRSF4 IL18 ILF3 CCL20<br>TNFRSF12A IL6ST CXCL13 IL12B TNFRSF8 IL6R BMPR2<br>IFNEIL1RAPL2IL3RA BMP4 CCL24 TNFSF13B CCR4<br>IL2RA IL32 TNFRSF10C IL22RA1 BMPR1A CXCR5 CXCR3<br>IFNA8 IL17REL IFNB1 IFNAR1 TNFRSF1B CCL17<br>IFNL1 IL16 IL1RL1 ILK CCL25 ILDR2 CXCR1 IL36RN<br>IL34 TGFB1 IFNG IL19 ILKAP BMP2K CCR10 ILDR1<br>EPO CCR7 IL17C IL23A CCR5 IL7 EPOR CCL13<br>IL2RG IL31RA TNFAIP6 IFNL2 BMP1 IL12RB1 TNFAIP8<br>IL4R TNFRSF6B TNFAIP8L1 TNFRSF10B IFNL3 CCL5<br>CXCL6 CXCL1 CCR3 TNFSF11 CSF1R IL21 IL1RAP<br>IL12RB2 CCL1 IL17RA CCR1 IL1RN TNFRSF11B<br>TNFRSF14 IL13 IL2RB BMP8B CCL2 IL24 IL18RAP<br>TGFB1 TNFSF10 TNFRSF11A CXCL5 IL5RA TNFSF9<br>IL1RL2 TNFRSF13C IL36G IL15RA TNFRSF21 CXCL8<br>IL22RA2 TNFAIP8L2 IL18R1 IFNLR1 CXCR6 CCL3L3<br>TNFRSF1A IL17RE IFNGR2 IL17RC TNFAIP8L3 ILVBL<br>TGFBRAP1 CCL4L1 CSF2RA CCRN4L CCL26 TNFAIP1<br>CCRL2 IFNA10 TNFRSF17 IFNA13 IL20 IL18BP CCL3L1<br>TNFSF12-TNFSF13 IL5 IL23R IL26 TNF TGFA CSF2<br>IL1F10 CXCL17 TNFSF13 IFNA4 IL37 IL12A IL7R IFNA1<br>IL1A IL4 IL2 CCL22 CSF3R IL10 IFNK TGFB2 IL1R2<br>IL1B IL17F IL27RA IL15 TNFSF8 IL36B XCL1 CXCL16<br>TNFRSF19 IL3 CCL3 IFNA2 BMPR1B IFNA21 TNFSF18<br>CCL8 IL17RB TNFRSF25 IL22 IL10RB IFNAR2 CCL18<br>IFNA16 CSF2RB IL36A TNFAIP3 IL13RA2 IL13RA1 CCR9<br>TNFRSF10A IFNA7 IFNW1 XCL2 TNFSF14 CCR2 |

|                        |          |          |             |          |          |          |           |
|------------------------|----------|----------|-------------|----------|----------|----------|-----------|
|                        | BMP15    | BMP10    | CCL15-CCL14 | TGFBR1   | IFNA5    | BMP7     |           |
|                        | IFNA14   | IL20RB   | IL10RA      | IFNA17   | CCR6     | TGFB3    | CCL15     |
|                        | CCL4     | CCL27    | TNFRSF13B   | TNFAIP2  | IL31     | IL17A    | TNFSF15   |
|                        | CCL19    | IFNA6    | IL9         |          |          |          |           |
| CD8+_T_cells           | CD8A     |          |             |          |          |          |           |
| Check-point            | IDO1     | LAG3     | CTLA4       | TNFRSF9  | ICOS     | CD80     |           |
|                        | PDCD1LG2 | TIGIT    | CD70        | TNFSF9   | ICOSLG   | KIR3DL1  |           |
|                        | CD86     | PDCD1    | LAIR1       | TNFRSF8  | TNFSF15  | TNFRSF14 |           |
|                        | IDO2     | CD276    | CD40        | TNFRSF4  | TNFSF14  | HLA2     | CD244     |
|                        | CD274    | HAVCR2   | CD27        | BTLA     | LGALS9   | TMIGD2   | CD28      |
|                        | CD48     | TNFRSF25 | CD40LG      | ADORA2A  | VTCN1    |          | CD160     |
|                        | CD44     | TNFSF18  | TNFRSF18    | BTNL2    | C10orf54 | CD200R1  |           |
|                        | TNFSF4   | CD200    | NRP1        |          |          |          |           |
| Cytolytic_activity     | PRF1     | GZMA     |             |          |          |          |           |
| DCs                    | CCL22    | CD209    | CCL13       | CCL17    |          |          |           |
| HLA                    | HLA-E    | HLA-DPB2 | HLA-C       | HLA-J    | HLA-DQB1 | HLA-DQB2 | HLA-DQA2  |
|                        |          | HLA-DQA1 | HLA-A       | HLA-DMA  |          |          |           |
|                        | HLA-DOB  | HLA-DRB1 | HLA-H       | HLA-B    | HLA-DRB5 |          |           |
|                        | HLA-DOA  | HLA-DPB1 | HLA-DRA     | HLA-DRB6 | HLA-L    |          |           |
|                        |          | HLA-F    | HLA-G       | HLA-DMB  | HLA-DPA1 |          |           |
| iDCs                   | CD1A     | CD1E     |             |          |          |          |           |
| Inflammation-promoting | CCL5     | CD19     | CD8B        | CXCL10   | CXCL13   | CXCL9    | GNLY      |
|                        | GZMB     | IFNG     | IL12A       | IL12B    | IRF1     | PRF1     | STAT1     |
|                        | TBX21    |          |             |          |          |          |           |
| Macrophages            | C11orf45 | CD68     | CLEC5A      | CYBB     | FUCA1    | GPNMB    | HS3ST2    |
|                        | LGMN     | MMP9     | TM4SF19     |          |          |          |           |
| Mast_cells             | CMA1     | MS4A2    | TPSAB1      |          |          |          |           |
| MHC_class_I            | B2M      | HLA-A    | TAP1        |          |          |          |           |
| Neutrophils            | EVI2B    | HSD17B11 | KDM6B       | MEGF9    | MNDA     | NLRP12   |           |
|                        | PADI4    | SELL     | TRANK1      | VNN3     |          |          |           |
| NK_cells               | KLRC1    | KLRF1    |             |          |          |          |           |
| Parainflammation       | CXCL10   | PLAT     | CCND1       | LGMN     | PLAUR    | AIM2     | MMP7      |
|                        | ICAM1    | MX2      | CXCL9       | ANXA1    | TLR2     | PLA2G2D  | ITGA2     |
|                        | MX1      | HMOX1    | CD276       | TIRAP    | IL33     | PTGES    | TNFRSF12A |
|                        | SCARB1   | CD14     | BLNK        | IFIT3    | RETNLB   | IFIT2    | ISG15     |
|                        | OAS2     | REL      | OAS3        | CD44     | PPARG    | BST2     | OAS1      |
|                        | NOX1     | PLA2G2A  | IFIT1       | IFITM3   | IL1RN    |          |           |
| pDCs                   | CLEC4C   | CXCR3    | GZMB        | IL3RA    | IRF7     | IRF8     | LILRA4    |
|                        | PLD4     | PTCRA    |             |          |          |          |           |
| T_cell_co-inhibition   | BTLA     | C10orf54 | CD160       | CD244    | CD274    | CTLA4    | HAVCR2    |
|                        | LAG3     | LAIR1    | TIGIT       |          |          |          |           |
| T_cell_co-stimulation  | CD2      | CD226    | CD27        | CD28     | CD40LG   | ICOS     | SLAMF1    |
|                        | TNFRSF18 | TNFRSF25 | TNFRSF4     | TNFRSF8  | TNFRSF9  |          |           |
|                        | TNFSF14  |          |             |          |          |          |           |

---

|                     |                                                                                                                                                                                                                                                                                                                                                                                                                                                                                                                                                                                                                                                                                                                                                                                    |
|---------------------|------------------------------------------------------------------------------------------------------------------------------------------------------------------------------------------------------------------------------------------------------------------------------------------------------------------------------------------------------------------------------------------------------------------------------------------------------------------------------------------------------------------------------------------------------------------------------------------------------------------------------------------------------------------------------------------------------------------------------------------------------------------------------------|
| T_helper_cells      | CD4                                                                                                                                                                                                                                                                                                                                                                                                                                                                                                                                                                                                                                                                                                                                                                                |
| Tfh                 | PDCD1 CXCL13 CXCR5                                                                                                                                                                                                                                                                                                                                                                                                                                                                                                                                                                                                                                                                                                                                                                 |
| Th1_cells           | IFNG TBX21 CTLA4 STAT4 CD38 IL12RB2 LTA<br>CSF2                                                                                                                                                                                                                                                                                                                                                                                                                                                                                                                                                                                                                                                                                                                                    |
| Th2_cells           | PMCH LAIR2 SMAD2 CXCR6 GATA3 IL26                                                                                                                                                                                                                                                                                                                                                                                                                                                                                                                                                                                                                                                                                                                                                  |
| TIL                 | ITM2C CD38 THEMIS2 GLYR1 ICOS F5 TIGIT<br>KLRD1 IRF4 PRKCQ FCRL5 SIRPG LPXN IL2RG<br>CCL5 LCK TRAF3IP3 CD86 MALLILRB1 DOK2 CD6<br>PAG1 LAX1 PLEK PIK3CD SLAMF1 XCL1 GPR171<br>XCL2 TBX21 CD2 CD53 KLHL6 SLAMF6 CD40 SIT1<br>TNFRSF4 CD79A CD247 LCP2 CD3D CD27 SH2D1A<br>FYB ARHGAP30 ACAP1 CST7 CD3G IL2RB CD3E<br>FCRL3 CORO1A ITK TCL1A CYBB CSF2RB IKZF1<br>NCF4 DOCK2 CCR2 PTPRC PLAC8 NCKAP1L IL7R<br>6-Sep CD28 STAT4 CD8A LY9 CD48 HCST<br>PTPRCAP SASH3 ARHGAP25 LAT TRAT1 IL10RA<br>PAX5 CCR7 DOCK11 PARVG SPNS1 CD52 HCLS1<br>ARHGAP9 GIMAP6 PRKCB MS4A1 GPR18 TBC1D10C<br>GVINP1 P2RY8 EVI2B VAMP5 KLRK1 SELLMPEG1<br>MS4A6A ARHGAP15 MFNG GZMK SELPLG TARP<br>GIMAP7 FAM65B INPP5D ITGA4 MZB1 GPSM3 STK10<br>CLEC2D IL16 NLRC3 GIMAP5 GIMAP4 IFFO1 CFH PVRIG<br>CFHR1 |
| Treg                | IL12RB2 TMPRSS6 CTSC LAPT4B TFRC RNF145<br>NETO2 ADAT2 CHST2 CTLA4 NFE2L3 LIMA1 IL1R2<br>ICOS HSDL2 HTATIP2 FKBP1A TIGIT CCR8 LTA<br>SLC35F2 IL21R AHCYL1 SOCS2 ETV7 BCL2L1 RRAGB<br>ACSL4 CHRNA6 BATF LAX1 ADPRH TNFRSF4<br>ANKRD10 CD274 CASP1 LY75 NPTN SSTR3<br>GRSF1 CSF2RB TMEM184C NDFIP2 ZBTB38 ERI1 TRAF3<br>NAB1 HS3ST3B1 LAYN JAK1 VDRLEPROT GCNT1<br>PTPRJ IKZF2 CSF1 ENTPD1 TNFRSF18 METTL7A<br>KSR1 SSH1 CADM1 IL1R1 ACP5 CHST7 THADA<br>CD177 NFAT5 ZNF282 MAGEH1                                                                                                                                                                                                                                                                                                   |
| Type_I_IFN_Reponse  | DDX4 IFIT1 IFIT2 IFIT3 IRF7 ISG20 MX1MX2<br>RSAD2 TNFSF10                                                                                                                                                                                                                                                                                                                                                                                                                                                                                                                                                                                                                                                                                                                          |
| Type_II_IFN_Reponse | GPR146 SELP AHR                                                                                                                                                                                                                                                                                                                                                                                                                                                                                                                                                                                                                                                                                                                                                                    |

---

**Supplementary Table S3. The chemotherapy drugs involved in the analysis**

| Drug name                 |                   |                                          |                                |
|---------------------------|-------------------|------------------------------------------|--------------------------------|
| METHOTREXATE              | Megestrol acetate | Homoharringtonine                        | 7-Ethyl-10-hydroxycamptothecin |
| 6-THIOGUANINE             | tfdu              | Mithramycin                              | Bortezomib                     |
| 6-MERCAPTOPYRIMIDINE      | Procarbazine      | Tegafur                                  | Irofulven                      |
| Nitrogen mustard          | Lomustine         | Parthenolide                             | Temsirolimus                   |
| Allopurinol               | Daunorubicin      | Dexrazoxane                              | Denileukin Diftitox            |
| Actinomycin D             | Daunorubicin      | Tamoxifen                                | Ontak                          |
| Chlorambucil              | STREPTOZOCIN      | PENTOSTATIN                              | Pemetrexed                     |
| Thiotepa                  | Calusterone       | RAPAMYCIN                                | Vorinostat                     |
| Melphalan                 | Estramustine      | Carboplatin                              | Estramustine                   |
| Triethylenemelamine       | Vinblastine       | Valrubicin                               | Arsenic trioxide               |
| Dromostanolone Propionate | Fluphenazine      | Idarubicin                               | Eribulin mesilate              |
| Acrichine                 | Arsenic trioxide  | Epirubicin                               | Gefitinib                      |
| Fluorouracil              | AZACITIDINE       | Oxaliplatin                              | Erlotinib                      |
| Nandrolone phenpropionate | Cladribine        | MITOXANTRONE                             | Fulvestrant                    |
| TESTOLACTONE              | Mithramycin       | Cytarabine                               | Celecoxib                      |
| Mithramycin               | Asparaginase      | Mitoxantrone                             | Zoledronate                    |
| Pipobroman                | Ifosfamide        | Fludarabine                              | Belinostat                     |
| Cyclophosphamide          | Acetalax          | Imiquimod                                | Lapatinib                      |
| Mitomycin                 | Fludarabine       | Carmustine                               | Irinotecan                     |
| Floxuridine               | Cisplatin         | Mithramycin                              | Dasatinib                      |
| Hydroxyurea               | Isotretinoin      | Rapamycin                                | Everolimus                     |
| Uracil mustard            | Teniposide        | Clofarabine                              | Pazopanib                      |
| Dexamethasone Decadron    | Doxorubicin       | Vinorelbine                              | Selumetinib                    |
| Mitotane                  | Fludarabine       | Topotecan                                | Imatinib                       |
| DACARBAZINE               | Bleomycin         | Gemcitabine                              | Lapatinib                      |
| Vinblastine               | Paclitaxel        | Bisacodyl, active ingredient of Viraplex | Nelfinavir                     |
| Acetalax                  | DECITABINE        | Irinotecan                               | Nilotinib                      |
| Cytarabine                | Mitomycin         | Docetaxel                                | Olaparib                       |
|                           |                   |                                          | Ixabepilone                    |

---

|             |              |              |             |
|-------------|--------------|--------------|-------------|
| Vincristine | Bendamustine | Depsipeptide | Raloxifene  |
| Raltitrexed | Etoposide    | Simvastatin  | Midostaurin |

---



**Supplementary Table S4. The clinical data of the HCC patients involved in this study**

| HCC patients                     | TCGA cohort (n=365) | ICGC cohort (n=231) |
|----------------------------------|---------------------|---------------------|
| <b>Age(median,range) (years)</b> | 57(16-90)           | 67(31-89)           |
| <b>Gender</b>                    |                     |                     |
| Male                             | 246                 | 170                 |
| Female                           | 119                 | 61                  |
| <b>Grade</b>                     |                     |                     |
| 1                                | 55                  | na                  |
| 2                                | 175                 | na                  |
| 3                                | 118                 | na                  |
| 4                                | 12                  | na                  |
| unknown                          | 5                   | na                  |
| <b>Stage</b>                     |                     |                     |
| I                                | 170                 | 36                  |
| II                               | 84                  | 105                 |
| III                              | 83                  | 71                  |
| IV                               | 4                   | 19                  |
| unknown                          | 24                  | 0                   |
| <b>Satus</b>                     |                     |                     |
| Alive                            | 235                 | 189                 |
| Dead                             | 130                 | 42                  |
